# Supplementary material for: Changes in the North Atlantic Oscillation over the 20th century
Source: Copernicus journal article supplement (doi:10.5194/wcd-5-753-2024), 2024-05-13
Supplement: Supplementary file 1 [file wcd-5-753-2024-supplement.pdf]

Supplement of Weather Clim. Dynam., 5, 753–762, 2024  
<https://doi.org/10.5194/wcd-5-753-2024-supplement>  
© Author(s) 2024. CC BY 4.0 License.

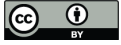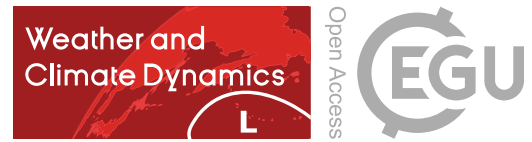

*Supplement of*

## **Changes in the North Atlantic Oscillation over the 20th century**

**Stephen Outten and Richard Davy**

*Correspondence to:* Stephen Outten ([stephen.outten@nersc.no](mailto:stephen.outten@nersc.no))

The copyright of individual parts of the supplement might differ from the article licence.

## Contents of this file

1. Figure S1: Percentage variability explained by the first mode of EOFs in the CMIP6 models and reanalyses.
2. Figure S2: Percentage variability explained in the first mode of the CBF of CMIP6 models for two 30-year periods.
3. Figure S3: Spatial pattern correlation between the first mode of CBF of CMIP6 models and EOF of ERA-20C reanalysis for two 30-year periods.
4. Figure S4: Taylor skill score between the first mode of CBF of CMIP6 models and EOF of ERA-20C reanalysis for two 30-year periods.
5. Figure S5: Absolute variability explained by the first mode of EOFs in the CMIP6 models and reanalyses.

Percentage of variance explained in moving 30-year period

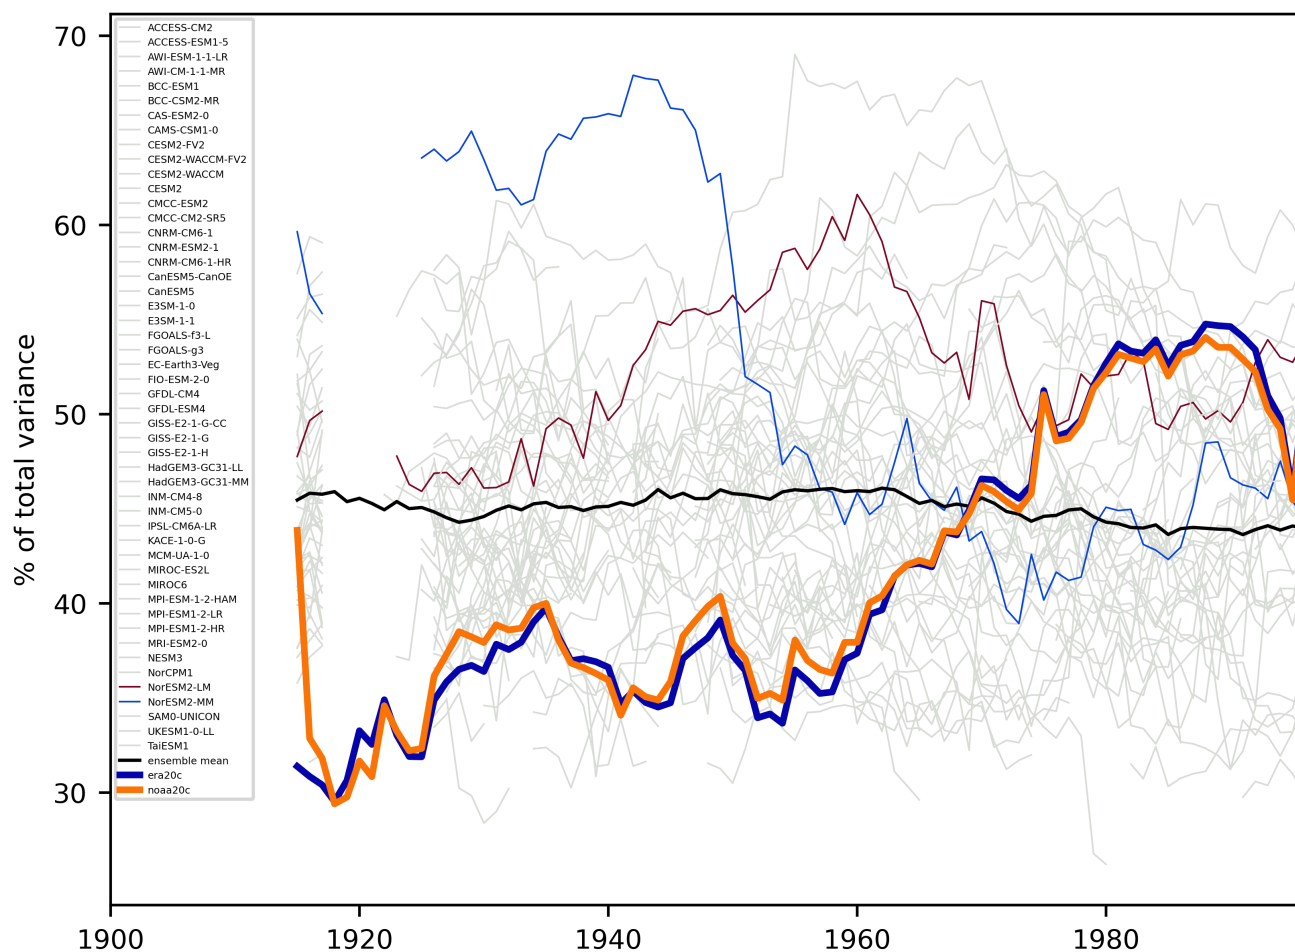

**Figure S1.** Percentage of variance explained by the first mode of EOF in the reanalyses and EOF in the CMIP6 models in a moving 30-year period. ERA20C and NOAA20c reanalyses are shown in bold in blue and orange respectively. CMIP6 models are shown by thin lines in grey, except for NorESM2-LM (red) and NorESM2-MM (blue). Multi-model ensemble mean is shown in thick black line. Individual models are only shown when the projected pattern correlates to the projected pattern of the first mode of EOF in the ERA-20C reanalysis at or above the 80% level.



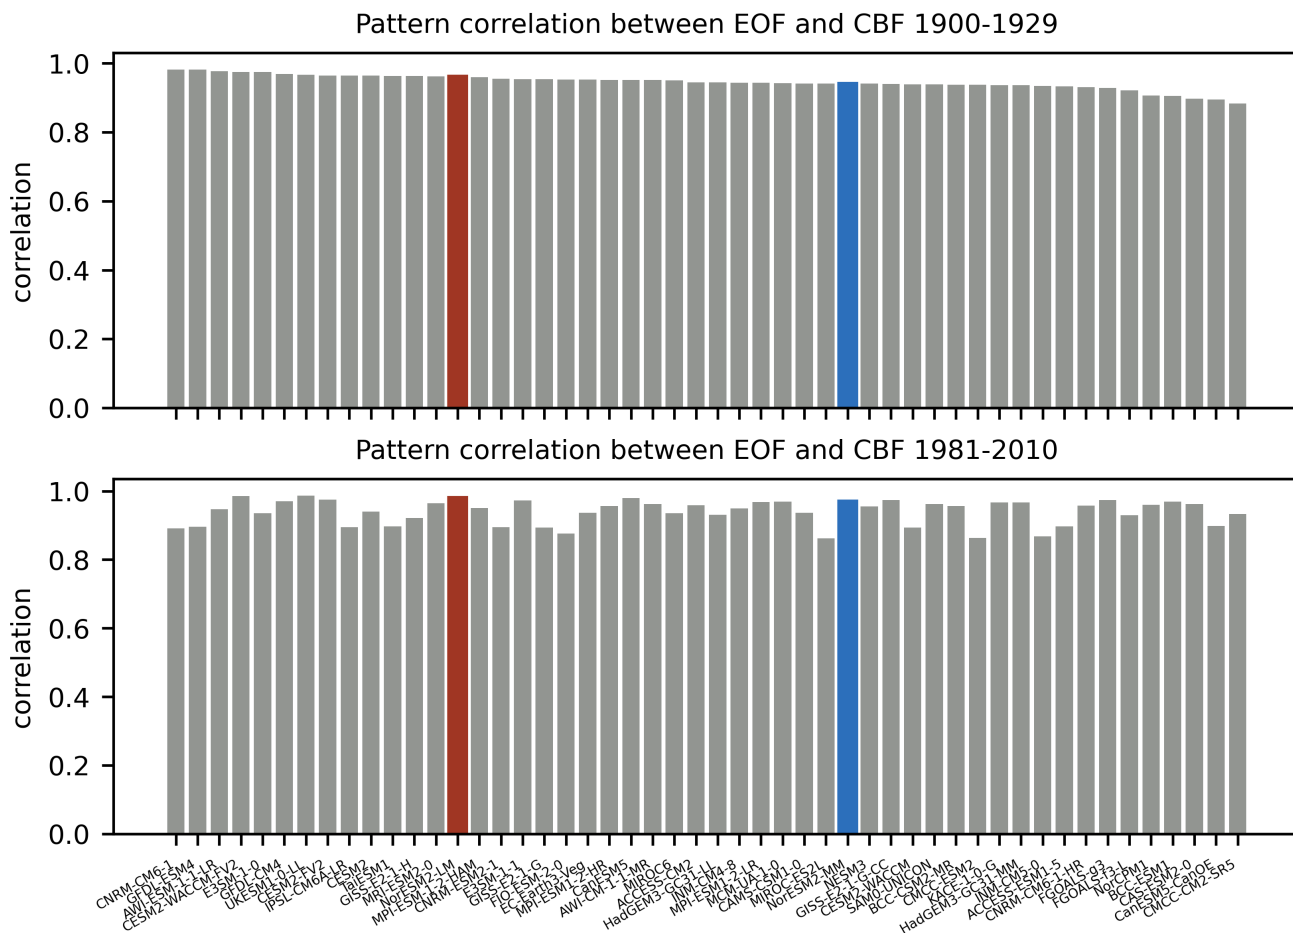

**Figure S3.** Correlation of the spatial pattern of the first mode from the Common Basis Function and the first mode of EOF from the ERA-20C reanalysis for each of the models in 30-year periods at the start and end of the full time series, 1900-1929 (top) and 1981-2010 (bottom). Models are ordered in both plots by the pattern correlation for the initial period of 1900-1929. CMIP6 models are shown in grey, except for NorESM2-LM (red) and NorESM2-MM (blue).

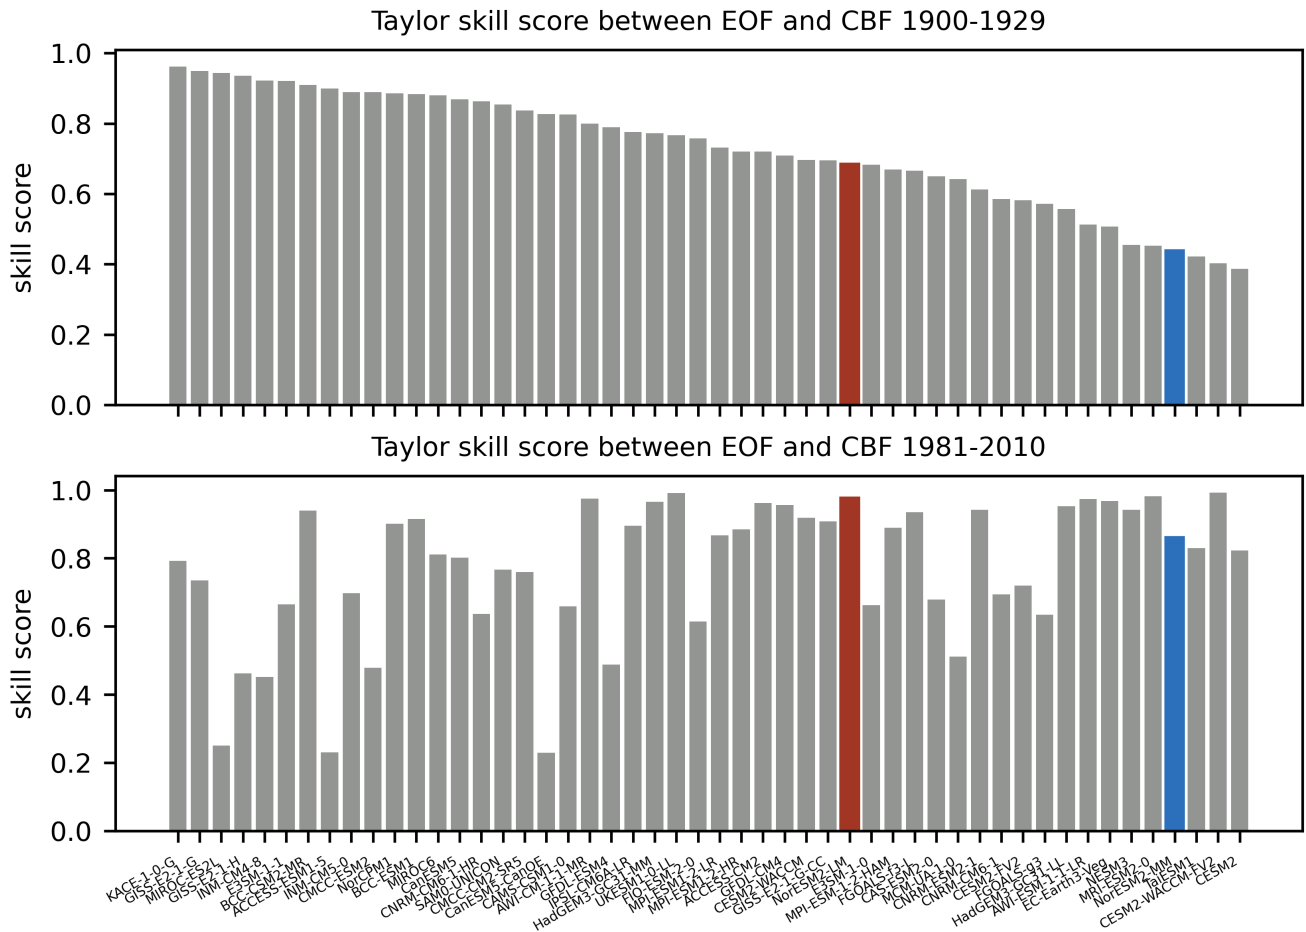

**Figure S4.** Taylor skill score between the first mode from the Common Basis Function and the first mode of EOF from the ERA-20C reanalysis for each of the models in 30-year periods at the start and end of the full time series, 1900-1929 (top) and 1981-2010 (bottom). Models are ordered in both plots by the skill score for the initial period of 1900-1929. CMIP6 models are shown in grey, except for NorESM2-LM (red) and NorESM2-MM (blue).

Total variance explained in moving 30-year period

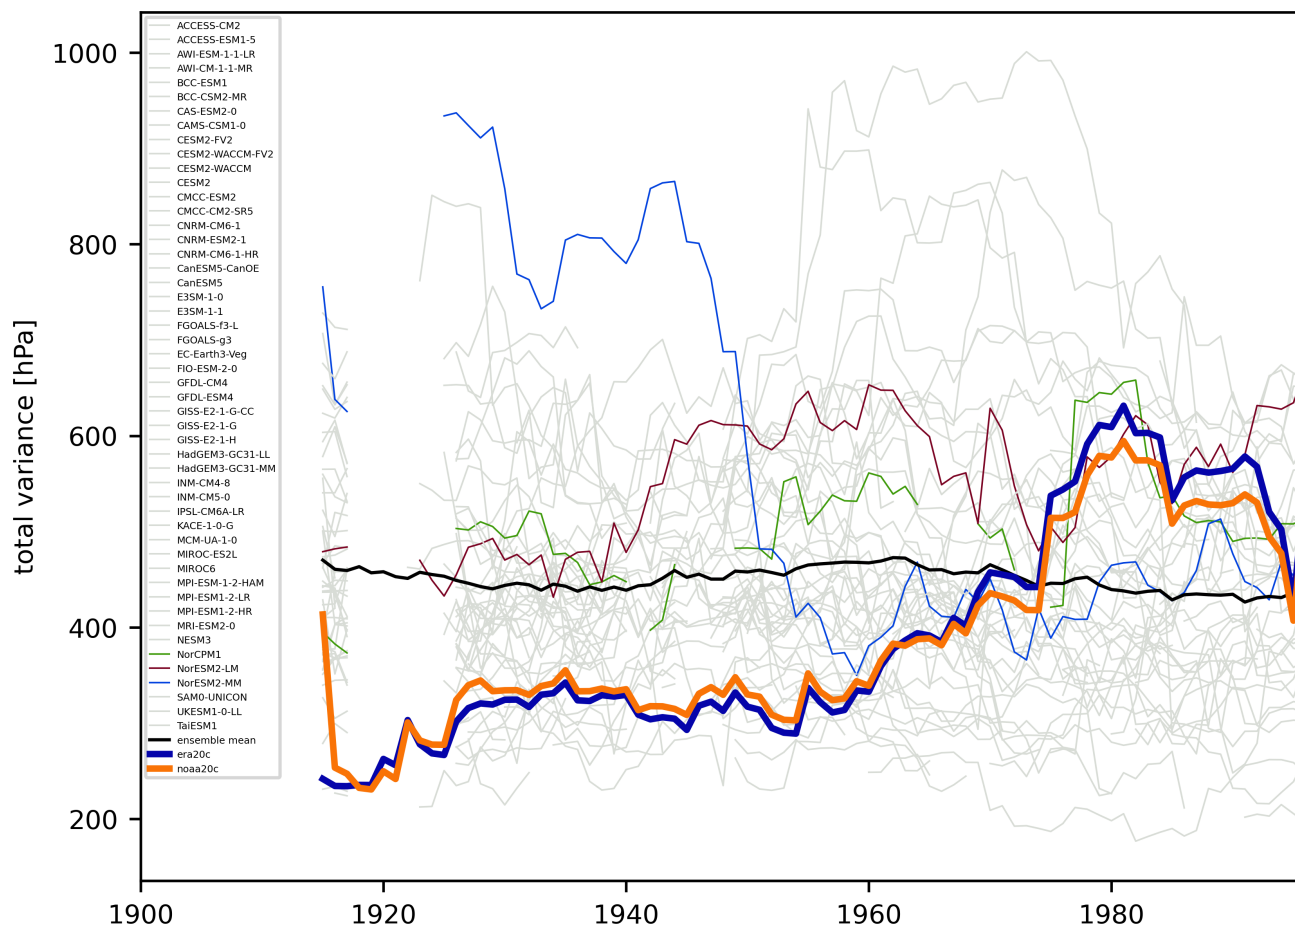

**Figure S5.** Absolute variance explained by the first mode of EOF in the reanalyses and EOF in the CMIP6 models in a moving 30-year period. This is a combination of the percentage variance explained as shown in Supplemental Figure S1 and the total variance in the sea level pressure, shown in Figure 5 in the main paper. ERA20C and NOAA20c reanalyses are shown in bold in blue and orange respectively. CMIP6 models are shown by thin lines in grey, except for NorESM2-LM (red) and NorESM2-MM (blue). Multi-model ensemble mean is shown in thick black line. Individual models are only shown when the projected pattern correlates to the projected pattern of the first mode of EOF in the ERA-20C reanalysis at or above the 80% level.
